# Supplementary material for: A cyclin D1/microRNA 17/20 regulatory feedback loop in control of breast cancer cell proliferation
Source: PubMed Central journal article supplement — J Cell Biol. 2008 Aug 11;182(3):509–17. doi: 10.1083/jcb.200801079 (PMC2500136; doi:10.1083/jcb.200801079), 2008-08-11
Supplement: jcb.200801079_6.pdf [file jcb.200801079_6.pdf]

Table S1. **Primer sequences for real-time PCR amplification on a cyclin D1 chromatin immunoprecipitation assay**

| <b>Fragments</b> | <b>Primer sequences (5'-3')</b>                          |
|------------------|----------------------------------------------------------|
| F1               | F: GGCTGTCCGTATTTACGTTG<br>R: GAAGGACCATGTGGGTGAAT       |
| F2               | F: GGGTCTCTGGGTAGGAAAGTT<br>R: TGTTCTGGAGGCGCTTTA        |
| F3               | F: CCCGGTCTTCTGTTCTCTAAA<br>R: CTCCAACCTGCTGTGGTCCT      |
| F4               | F: CCACAGCAGTTGGAGAAACA<br>R: GATTATGATCAGCAGCAATCAC     |
| F5               | F: GGAGCTGTACAGTGGAGTCG<br>R: AAAGCCCAATAATTTACAGTTGA    |
| F6               | F: TCCTGCTAGTATTGCTCGACTC<br>R: TTCCAACCTCCTAACAGCAA     |
| F7               | F: GATTTGGACGGTGGTAGTAATTT<br>R: AAAGCTACTGGTGCAGTTAGGTC |
| F8               | F: AACTCATTAAGTACGGATTTGCT<br>R: CTGCATAAGCCAGTTTCAA     |
| F9               | F: CGTCTGCTACAATTGACTGAT<br>R: TCCTCTTCTGGCTTCCACTT      |
| F10              | F: CCACGTGGATGTGAAGATTT<br>R: CCTCTCCCAAATGGATTGAC       |
| F11              | F: TTCCAGTGCTAGTTGGATGG<br>R: TTCAGCATAATCCCTAATGGG      |

F, forward; R, reverse.
